# Supplementary material for: FTY720 Reduces Lipid Accumulation by Upregulating ABCA1 through Liver X Receptor and Sphingosine Kinase 2 Signaling in Macrophages
Source: MDPI journal article supplement (doi:10.3390/ijms232314617), 2022-11-23
Supplement: s1 [file s1]

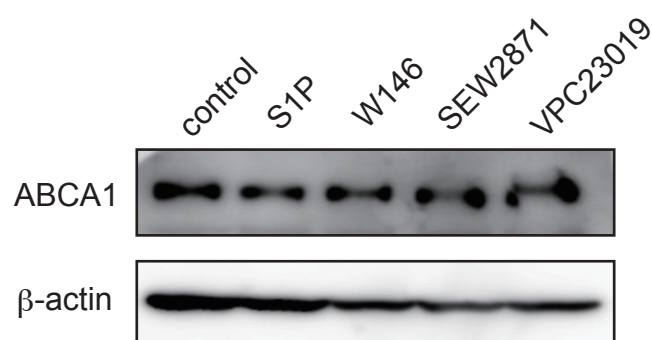

**Supplemental Figure S1.** SIP receptors may not involved in the FTY-induced ABCA1 upregulation.

J774 cells were incubated with S1P (3  $\mu$ M), W146 (1  $\mu$ M), SEW2871 (1  $\mu$ M) or VPC23019 (1  $\mu$ M) for 24 h. ABCA1 and  $\beta$ -actin were analyzed by western blotting.

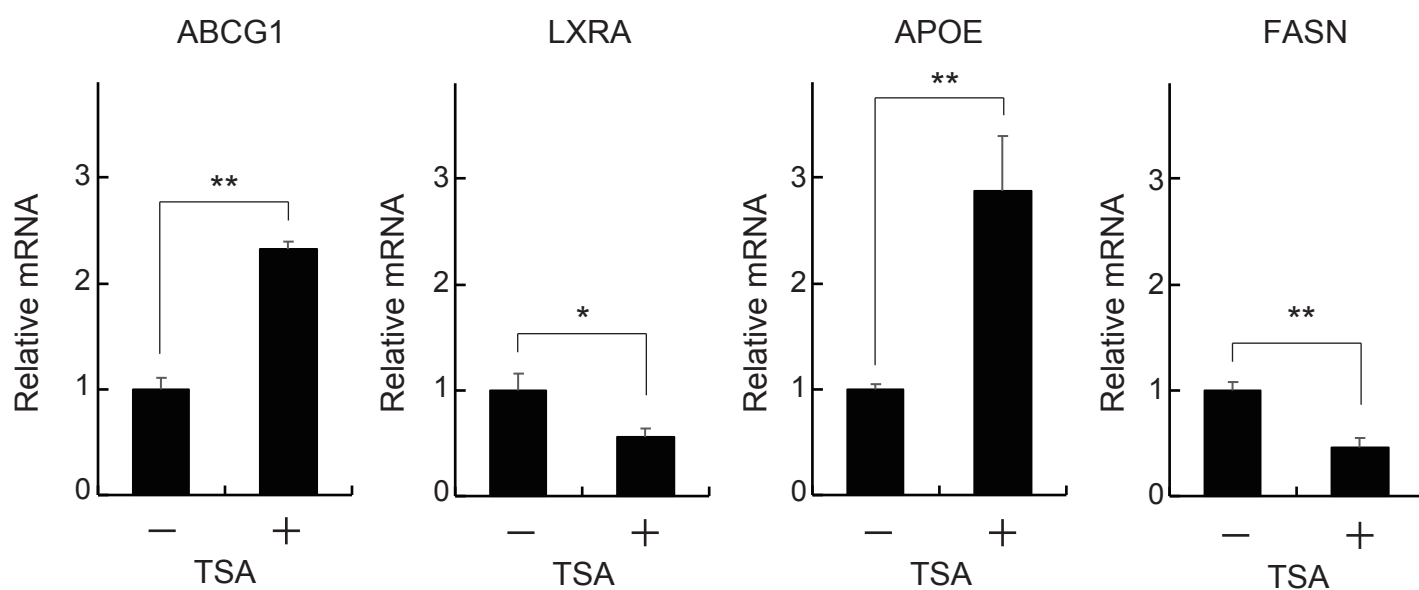

**Supplemental Figure S2.** Changes of LXR-tarargeted genes by Tricostatin A (TSA) treatment.

RAW264 cells were incubated with TSA (1  $\mu$ M) for 6 h. ABCG1, LXRA, APOE, FASN mRNA levels were analyzed by RT-qPCR. Each value represents the mean  $\pm$  S. D. (n = 3). P < 0.001.
